# Supplementary material for: Multifunctional amorphous FeCoNiTixSi high-entropy alloys with excellent electromagnetic-wave absorption performances
Source: Royal Society of Chemistry journal article supplement (doi:10.1039/d3cp02641h), 2023-01-01
Supplement: d3cp02641h1.pdf [file d3cp02641h1.pdf]

Supplementary materials for

**Multifunctional amorphous FeCoNiTi<sub>x</sub>Si high-entropy alloys with excellent electromagnetic-wave absorption performances**

Lei Jia<sup>a</sup>, Linwen Jiang<sup>a,\*</sup>, Haoran Zhou<sup>a</sup>, Siqin Yan<sup>a,b</sup>, Anhua Wu<sup>c</sup>, Xiaofeng Zhang<sup>b,\*</sup>

<sup>a</sup>School of Materials Science and Chemical Engineering, State Key Laboratory Base of Novel Functional Materials and Preparation Science, Ningbo University, Ningbo 315211, PR China

<sup>b</sup>Institute of New Materials, Guangdong Academy of Science, National Engineering Laboratory for Modern Materials Surface Engineering Technology, Guangzhou 510651, PR China

<sup>c</sup>Shanghai Institute of Ceramics, Chinese Academy of Sciences, Shanghai 201800, PR China

Corresponding author.

E-mail addresses: [jianglinwen@nbu.edu.cn](mailto:jianglinwen@nbu.edu.cn) (Linwen Jiang), [zhangxiaofeng@gdinm.com](mailto:zhangxiaofeng@gdinm.com) (Xiaofeng Zhang).

## Supplementary Table and Figures

**Table S1** Melting point, Crystal structure, and atomic radius.

| Element            | Fe   | Co   | Ni   | Ti   | Si   |
|--------------------|------|------|------|------|------|
| Melting point (°C) | 1538 | 1495 | 1455 | 1668 | 1414 |
| Crystal structure  | BCC  | HCP  | FCC  | HCP  | FCC  |
| Atomic radius (pm) | 126  | 125  | 124  | 147  | 111  |

$$\Omega = \frac{T\Delta S_{mix}}{|\Delta H_{mix}|} \quad (S1)$$

$$\delta = \sqrt{\sum_{i=1}^n c_i (1 - r_i / \bar{r})^2} \quad (S2)$$

$$VEC = \sum_i^n c_i (VEC)_i \quad (S3)$$

Where  $c_i$  is the mole fraction of element  $i$ .  $\bar{r}$  and  $T_m$  are the average atomic radius and the melting point of the alloy, respectively. The  $\Delta H_{ij}^{mix}$  represents the mixing enthalpy of a binary system of equimolar composition in the liquid phase.

**Table S2** Grain sizes, internal stress, the crystallinity and lattice constant of samples

| Samples                                       | #T001  | #T010  | #T030  |
|-----------------------------------------------|--------|--------|--------|
| Grain size (nm)                               | 10.2   | 12     | 12.8   |
| Intrinsic strain ( $\epsilon \cdot 10^{-3}$ ) | 0.892  | 0.768  | 0.718  |
| Crystallinity(%)-BCC                          | 57.15  | 59.95  | 64.51  |
| Lattice Constant(A)-BCC                       | 4.0508 | 4.0509 | 4.3609 |

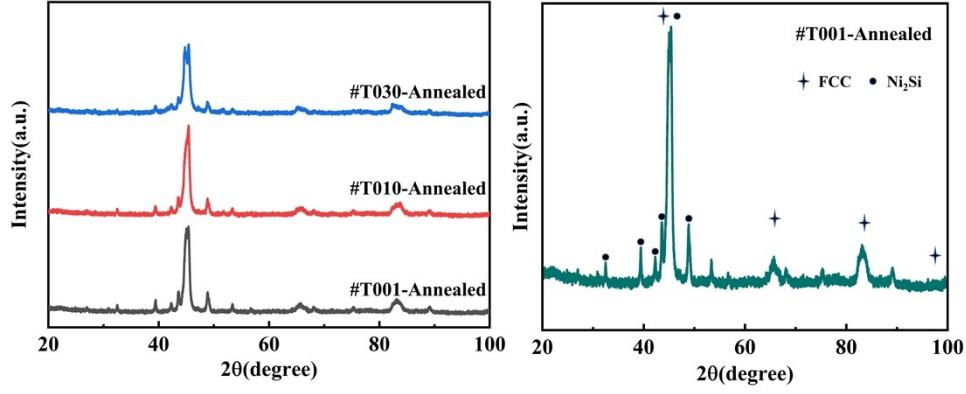

Fig. S1 XRD diagram of #T001, #T010, and #T030 after annealing.

Table S3 Binary mixing enthalpies for each atom pair in Fe–Co–Ni–Ti–Si alloys.

| $\Delta H_{ij}^{mix}$ (kJ×mol <sup>-1</sup> ) |    |    |     |     |  |
|-----------------------------------------------|----|----|-----|-----|--|
| Fe                                            | -1 | -2 | -17 | -35 |  |
| /                                             | Co | 0  | -28 | -38 |  |
| /                                             | /  | Ni | -35 | -40 |  |
| /                                             | /  | /  | Ti  | -45 |  |
| /                                             | /  | /  | /   | Si  |  |

Table S4 Chemical Compositions of samples #T001, #T010, #T030, #T100 and #T200.

| Samples | Atomic percent(%) |       |       |       |       |
|---------|-------------------|-------|-------|-------|-------|
|         | Fe                | Co    | Ni    | Ti    | Si    |
| #T001   | 27.49             | 27.77 | 25.92 | 0.34  | 18.48 |
| #T010   | 26.18             | 26.89 | 24.58 | 2.5   | 19.85 |
| #T030   | 26.08             | 23.83 | 22.50 | 8.86  | 18.72 |
| #T100   | 23.19             | 21.64 | 20.27 | 19.76 | 15.14 |
| #T200   | 33.41             | 17.27 | 17.17 | 33.41 | 12.91 |

Table S5 Electrochemical parameters of equivalent circuit under different stray current densities.

| Samples | $R_s$<br>( $\Omega$ cm <sup>2</sup> ) | $CPE_1-T$<br>( $\mu\Omega^{-1}$ cm <sup>2</sup> s <sup>p</sup> ) | $CPE_1-P$<br>(F/cm) | $CPE_2-T$<br>( $\mu\Omega^{-1}$ cm <sup>2</sup> s <sup>p</sup> ) | $CPE_2-P$<br>(F/cm) | $R_{ct1}$ | $R_{ct2}$ |
|---------|---------------------------------------|------------------------------------------------------------------|---------------------|------------------------------------------------------------------|---------------------|-----------|-----------|
| #T001   | 4.088                                 | 0.00034277                                                       | 0.67895             | 0.00017381                                                       | 0.92338             | 127.6     | 33639     |
| #T010   | 3.308                                 | 0.00026379                                                       | 0.67015             | 0.00016832                                                       | 0.91616             | 109.1     | 129390    |
| #T030   | 3.584                                 | 0.00030884                                                       | 0.67077             | 0.00018296                                                       | 0.86741             | 123.9     | 694680    |

|       |       |            |         |            |         |       |         |
|-------|-------|------------|---------|------------|---------|-------|---------|
| #T100 | 3.768 | 0.0003933  | 0.70339 | 0.00017699 | 0.88591 | 63.22 | 1.202E7 |
| #T200 | 3.575 | 0.00024919 | 0.67073 | 0.00015231 | 0.90477 | 84.9  | 300370  |

$R_s$  represents the solution resistance,  $CPE_1$  the double-layer capacitance at the passivation film/material interface,  $R_{ct1}$  the electrochemical transfer resistance,  $CPE_2$  the passivation film capacitance, and  $R_{ct2}$  the ion transport resistance in the passivation film.

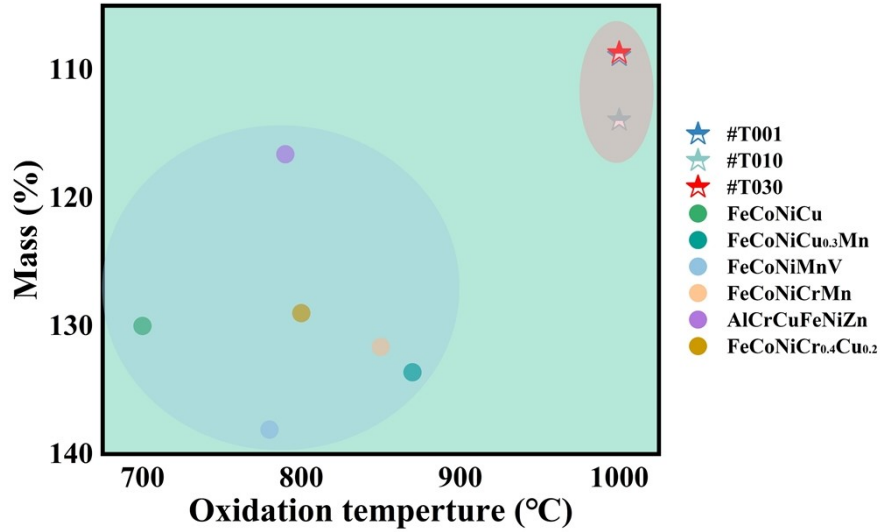

Fig. S2 The comparison of oxidation resistance properties with other related materials.<sup>1-6</sup>

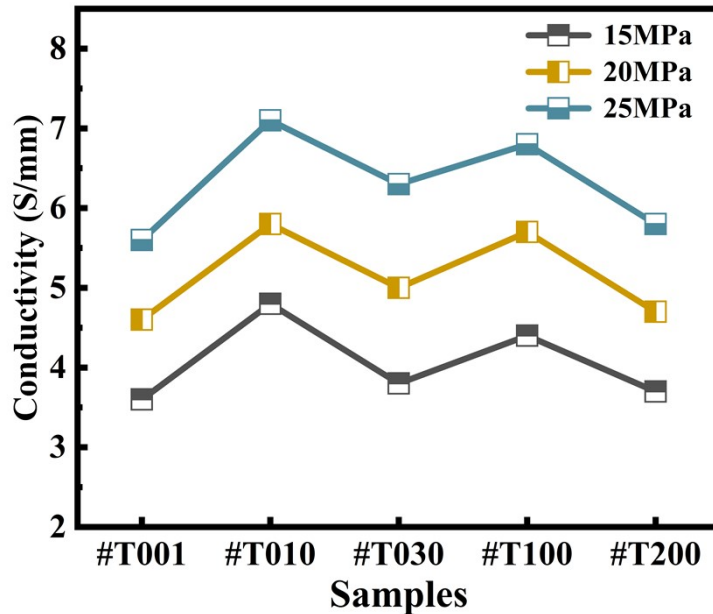

Fig. S3 Conductivity of  $FeCoNiTi_xSi$  ( $x = 0.01, 0.1, 0.3, 1$  and  $2$ ) HEAs powders under different pressures.

Table S6 The detailed conductivity of  $FeCoNiTi_xSi$  ( $x = 0.01, 0.1, 0.3, 1$ , and  $2$ ) HEAs under different pressures.

| Pressure<br>(MPa) | Conductivity (S/mm) |       |       |       |       |
|-------------------|---------------------|-------|-------|-------|-------|
|                   | #T001               | #T010 | #T030 | #T100 | #T200 |
| 15                | 3.6                 | 4.8   | 3.8   | 4.4   | 3.7   |
| 20                | 4.6                 | 5.8   | 5     | 5.7   | 4.7   |
| 25                | 5.6                 | 7.1   | 6.3   | 6.8   | 5.8   |

**Table S7** The detailed data of EMW absorption properties of FeCoNiTi<sub>x</sub>Si (x = 0.01, 0.1, 0.3, 1, and 2) HEAs in the 2–18 GHz range.

| Samples | RL <sub>min</sub> (dB) | Frequency (GHz) | d <sub>min</sub> | Bandwidth (GHz) | RL<-10 dB   | d (mm) |
|---------|------------------------|-----------------|------------------|-----------------|-------------|--------|
| #T001   | -68.4                  | 6.14            | 3.08             | 5.15            | 11.67-16.82 | 1.69   |
| #T010   | -28.3                  | 8.96            | 2.76             | 3.68            | 9.86-13.54  | 2.31   |
| #T030   | -30.5                  | 10.80           | 2.32             | 4.03            | 11.48-15.51 | 1.94   |
| #T100   | -63.4                  | 9.12            | 2.18             | 3.64            | 13.80-17.45 | 1.42   |
| #T200   | -21.3                  | 18              | 4                | -               | -           | -      |

**Table S8** The comparison of comprehensive properties with related materials.

|                                                                                                                | RL <sub>min</sub><br>(dB) | EMB<br>(GHz) | d <sub>m</sub><br>(mm) | Nanohardness<br>(Gpa) | i <sub>corr</sub><br>(μA/cm <sup>2</sup> ) | Ref.      |
|----------------------------------------------------------------------------------------------------------------|---------------------------|--------------|------------------------|-----------------------|--------------------------------------------|-----------|
| #T001                                                                                                          | -68.4                     | 5.12         | 1.69                   | 3.97                  | 1.64                                       | This work |
| #T100                                                                                                          | -63.4                     | 3.64         | 1.42                   | 3.07                  | 1.49                                       | This work |
| FeSi                                                                                                           | -19.3                     | 3.9          | 3.03                   | -                     | -                                          | Ref. 40   |
| FeSiAl                                                                                                         | -39.7                     | 0.85         | 4                      | -                     | -                                          | Ref. 36   |
| FeCoNiCrMn                                                                                                     | -                         | -            | -                      | 2.35                  | -                                          | Ref. 43   |
| FeCoNiCuAlCe <sub>0.09</sub>                                                                                   | -                         | -            | -                      | -                     | 4.01                                       | Ref. 46   |
| FeCrMoNiPBCSi                                                                                                  | -60.3                     | 2.3          | 3.55                   | -                     | -                                          | Ref. 16   |
| FeCoNiMn <sub>0.5</sub> Al <sub>0.4</sub>                                                                      | -42.9                     | 4.4          | 3                      | -                     | -                                          | Ref. 38   |
| Fe <sub>77.6</sub> Si <sub>12.3</sub> Al <sub>10.1</sub>                                                       | -22.2                     | 6            | 2                      | -                     | -                                          | Ref. 35   |
| FeCoNiCuTi <sub>0.2</sub>                                                                                      | -47.8                     | 4.76         | 2.16                   | -                     | 0.949                                      | Ref. 15   |
| FeCoNiCuC <sub>0.04</sub>                                                                                      | -61.1                     | 5.1          | 1.72                   | 3.42                  | 5.14                                       | Ref. 41   |
| FeCoNi(Si <sub>0.6</sub> Al <sub>0.2</sub> B <sub>0.2</sub> )                                                  | -44.1                     | 3.8          | 2                      | -                     | -                                          | Ref. 44   |
| Ti <sub>21.6</sub> Al <sub>11.3</sub> Cr <sub>19.4</sub> Si <sub>23.5</sub> V <sub>22.0</sub> O <sub>2.2</sub> | -                         | -            | -                      | -                     | 6.14                                       | Ref. 39   |
| HCNs                                                                                                           | -45.7                     | 3.9          | 3.6                    | -                     | -                                          | Ref. 34   |
| Co <sub>4</sub> Fe <sub>6</sub>                                                                                | 38.7                      | 6.9          | 2                      | -                     | -                                          | Ref. 45   |
| Mg <sub>65</sub> Ni <sub>20</sub> Nd <sub>15</sub>                                                             | -                         | -            | -                      | 3.4                   | -                                          | Ref. 42   |
| FeCoNiMn <sub>0.5</sub> Al <sub>0.2</sub>                                                                      | -44.4                     | 3.825        | 3                      | 3.97                  | -                                          | Ref. 37   |

## Reference:

1. H. Zhou, L. Jiang, S. Zhu, L. Wang, Y. Hu, X. Zhang and A. Wu, *J. Alloys Compd.*, 2023, **936**, 168282.
2. X. Liu, Y. Duan, Z. Li, H. Pang, L. Huang, X. Yang, Y. Shi, T. Wang and X. Lv, *ACS Appl. Mater. Interfaces*, 2022, **14**, 7012-7021.
3. J. Yang, L. Jiang, Z. Liu, Z. Tang and A. Wu, *J. Mater. Sci. Technol.*, 2022, **113**, 61-70.
4. N. T. B. N. Koundinya, C. Sajith Babu, K. Sivaprasad, P. Susila, N. Kishore Babu and J. Baburao, *J. Mater. Eng. Perform.*, 2013, **22**, 3077-3084.
5. H. Zhou, L. Jiang, S. Zhu, L. Jia, A. Wu and X. Zhang, *J. Alloys Compd.*, 2023, **946**, 169402.
6. H. Zhou, L. Jiang, L. Jia, Z. Tang, L. Wang, A. Wu and X. Zhang, *Journal of Materials Chemistry C*, 2022, **10**, 16696-16705.
